# Supplementary material
Source: PubMed Central journal article supplement (PMC4907543)
Supplement: NIHMS782597-supplement-Supplemental_Table_1.pdf [file NIHMS782597-supplement-Supplemental_Table_1.pdf]

**Supplemental Table 1: Genetic testing panels**

| <b>Company</b>   | <b>Panel</b>                                                                                                                                                                                        | <b>Patients tested</b> |
|------------------|-----------------------------------------------------------------------------------------------------------------------------------------------------------------------------------------------------|------------------------|
| Transgenomic     |                                                                                                                                                                                                     |                        |
|                  | ACTC, GLA, LAMP2, MYBPC3, MYH7, MYL2, MYL3, PRKAG2, TNNT2, TNNI3, TNNC1, TPM1                                                                                                                       | 136                    |
|                  | As above with additional- DSG2, DSP, LDB3, LMNA, PKP2, SCT5A, TMEM43,                                                                                                                               | 1                      |
|                  | MYH7, MYL2, MYBPC3                                                                                                                                                                                  | 1                      |
| GeneDx           |                                                                                                                                                                                                     |                        |
|                  | MYH7, TNNT2, TPM1, MYBPC3, TNNI3, MYL3, MYL2, ACTC, TTR, TNNC1, CAV3, LAMP2, GLA, PRKAG2, MTTG, MTTI, MTTK, MTTQ                                                                                    | 33                     |
|                  | MYBPC3                                                                                                                                                                                              | 2                      |
| Correlagen       |                                                                                                                                                                                                     |                        |
|                  | MYBP3, MYH7, MYL3, ACTC, TNNT2, TNNI3, TPM1, MYL2                                                                                                                                                   | 12                     |
|                  | MYBPC3, MYH7, TTNT2                                                                                                                                                                                 | 1                      |
|                  | MYBPC3                                                                                                                                                                                              | 1                      |
| Harvard Partners |                                                                                                                                                                                                     |                        |
|                  | ACTC, GLA, LAMP2, MYBPC3, MYH7, MYL2, MYL3, PRKAG2, TNNI3, TNNT2, TPM1                                                                                                                              | 6                      |
| Mayo             |                                                                                                                                                                                                     |                        |
|                  | MYH7, MYBPC3, TNNT2, TNNI3, TPM1, MYL2, MYL3, TNNC1, ACTC                                                                                                                                           | 4                      |
| Ambry            |                                                                                                                                                                                                     |                        |
|                  | ACTC1, ACTN2, ANKRD1, CALR3, CAV3, CSRP3, DES, FXN, GLA, JPH2, LAMP2, MYBPC3, MYH5, MYH7, MYL2, MYL3, MYOM1, MYOZ2, NEXN, PLN, PRKAG2, PTPN11, RAF1, TCAP, TNNC1, TNNI3, TNNT2, TPM1, TTM, TTR, VCL | 1                      |
