# Supplementary material
Source: PubMed Central journal article supplement (PMC4907543)
Supplement: NIHMS782597-supplement-Supplemental_Table_2.pdf [file NIHMS782597-supplement-Supplemental_Table_2.pdf]

| Gene   | Nucleotide change | Protein change | Variant type | No. of pts. | Mutation classification (as reported on original report) | ClinVar (n)                   | Ref        | ExAC MAF (Allele Count) | UCSC Cons | UCSC Status | Grantham Score   | PolyPhen 2        | Condel      | Mutation Assessor | SIFT      |
|--------|-------------------|----------------|--------------|-------------|----------------------------------------------------------|-------------------------------|------------|-------------------------|-----------|-------------|------------------|-------------------|-------------|-------------------|-----------|
| ACTC1  | c.309C>A          | p.His103Gln    | Missense     | 1           | Dominant, possibly associated                            | -                             |            | -                       | 0         | Pathogenic  | Benign (24)      | Possibly damaging | Deleterious | Medium            | Tolerated |
| LAMP2  | c.1171G>A         | p.Val391Ile    | Missense     | 1*          | VUS                                                      | -                             |            | -                       | 41        | Benign      | Benign (30)      | -                 | Neutral     | Neutral           | Tolerated |
| LAMP2  | c.755T>G          | p.Ile252Ser    | Missense     | 1           | VUS                                                      | Benign                        |            | -                       | 17        | Benign      | Pathogenic (142) | Possibly damaging | Neutral     | Medium            | Tolerated |
| MYBPC3 | c.41A>G           | p.Lys14Arg     | Missense     | 1*          | VUS                                                      | -                             |            | 0.00121% (1/82480)      | 0         | Pathogenic  | Benign (26)      | Possibly damaging | Neutral     | Low               | Tolerated |
| MYBPC3 | c.177_187 del11   | p.Glu60fs      | Frameshift   | 1           | Probable deleterious mutation                            | -                             |            | -                       | -         | -           | -                | -                 | -           | -                 | -         |
| MYBPC3 | c.436dupA         | p.Thr146fs     | Frameshift   | 1           | Disease- causing mutation                                | -                             |            | -                       | -         | -           | -                | -                 | -           | -                 | -         |
| MYBPC3 | c.481C>A          | p.Pro161Thr    | Missense     | 1           | Likely disease-causing mutation                          | Pathogenic (1), Uncertain (1) |            | 0.00415% (1/24106)      | 0         | Pathogenic  | Benign (38)      | Probably damaging | Deleterious | Medium            | Damaging  |
| MYBPC3 | c.484C>T          | p.Gln162Ter    | Nonsense     | 1           | Probable deleterious mutation                            | -                             |            | -                       | -         | -           | -                | -                 | -           | -                 | -         |
| MYBPC3 | c.506-17C>T       | p.IVS4-17C>T   | Splicing     | 1           | Unknown**                                                | Benign (1)                    |            | 0.017845% (8/44830)     | -         | -           | -                | -                 | -           | -                 | -         |
| MYBPC3 | c.655G>T          | p.Val219Phe    | Missense     | 1*          | Deleterious mutation                                     | Pathogenic (1)                | 13, 23     | 0.00106% (1/94000)      | 4         | Benign      | Benign (50)      | Probably damaging | Deleterious | Medium            | Damaging  |
| MYBPC3 | c.655G>C          | p.Val219Leu    | Missense     | 2           | VUS                                                      | Pathogenic (2)                |            | -                       | 4         | Benign      | Benign (32)      | Possibly damaging | Deleterious | Medium            | Tolerated |
| MYBPC3 | c.682G>A          | p.Asp228Asn    | Missense     | 1           | VUS                                                      | Uncertain (1)                 | 29, 33     | 0.00569% (6/105368)     | 12        | Benign      | Benign (23)      | Benign            | Neutral     | Neutral           | Damaging  |
| MYBPC3 | c.772G>A          | p.Glu258Lys    | Missense     | 4           | Deleterious mutation                                     | Pathogenic (6)                | 24, 34     | 0.00390% (3/76868)      | 1         | Benign      | Benign (57)      | Possibly damaging | Deleterious | Medium            | Damaging  |
| MYBPC3 | c.821+1G>A        | p.IVS7+1G>A    | Splicing     | 2           | Probable deleterious mutation                            | -                             | 23, 24     | 0.00431% (1/23204)      | -         | -           | -                | -                 | -           | -                 | -         |
| MYBPC3 | c.927-9G>A        | p.IVS11-9G>A   | Splicing     | 2*          | Disease- causing mutation                                | -                             |            | -                       | -         | -           | -                | -                 | -           | -                 | -         |
| MYBPC3 | c.927-2A>G        | p.IVS11-2A>G   | Splicing     | 1           | Predicted deleterious mutation                           | -                             | 24, 35     | -                       | -         | -           | -                | -                 | -           | -                 | -         |
| MYBPC3 | c.1090+1G>T       | p.IVS12+1G>T   | Splicing     | 1           | Dominant, probably associated                            | -                             |            | -                       | -         | -           | -                | -                 | -           | -                 | -         |
| MYBPC3 | c.1168delC        | p.His390fs     | Frameshift   | 2           | Dominant, probably associated                            | -                             | 13, 23     | -                       | -         | -           | -                | -                 | -           | -                 | -         |
| MYBPC3 | c.1474delG        | p.Glu492fs     | Frameshift   | 1           | Dominant, probably associated                            | -                             |            | -                       | -         | -           | -                | -                 | -           | -                 | -         |
| MYBPC3 | c.1813G>A         | p.Asp605Asn    | Missense     | 1           | Published, disease-causing mutation**                    | Pathogenic (1) Uncertain (2)  | 23         | 0.01889% (9/47656)      | 2         | Benign      | Benign (23)      | Benign            | Neutral     | Low               | Tolerated |
| MYBPC3 | c.1928-2A>G       | p.IVS20-2A>G   | Splicing     | 1           | Published, disease-causing mutation                      | -                             | 13, 10     | -                       | -         | -           | -                | -                 | -           | -                 | -         |
| MYBPC3 | c.2096delC        | p.Pro699fs     | Frameshift   | 5           | Predicted deleterious mutation                           | -                             | 23, 25, 26 | -                       | -         | -           | -                | -                 | -           | -                 | -         |
| MYBPC3 | c.2132G>A         | p.Trp711Ter    | Nonsense     | 1           | Predicted deleterious mutation                           | -                             |            | -                       | -         | -           | -                | -                 | -           | -                 | -         |
| MYBPC3 | c.2308+1G>A       | p.IVS23+1G>A   | Splicing     | 1           | Disease-causing mutation                                 | -                             |            | -                       | -         | -           | -                | -                 | -           | -                 | -         |
| MYBPC3 | c.2373dupG        | p.Trp792fs     | Frameshift   | 2*          | Deleterious mutation                                     | Pathogenic (6)                | 27, 28     | 0.00378% (1/26444)      | -         | -           | -                | -                 | -           | -                 | -         |

|        |                    |               |            |    |                                     |                                           |        |                       |    |            |                  |                   |             |         |           |
|--------|--------------------|---------------|------------|----|-------------------------------------|-------------------------------------------|--------|-----------------------|----|------------|------------------|-------------------|-------------|---------|-----------|
| MYBPC3 | c.2374T>C          | p.Trp792Arg   | Missense   | 2* | Published, disease-causing mutation | Pathogenic (4)                            | 23     | -                     | 1  | Benign     | Pathogenic (101) | Probably damaging | Deleterious | High    | Damaging  |
| MYBPC3 | c.2450G>A          | p.Arg817Gln   | Missense   | 1  | Possible deleterious mutation       | Uncertain (2)                             |        | 0.00166% (2/120688)   | 0  | Pathogenic | Benign (43)      | Probably damaging | Deleterious | Medium  | Damaging  |
| MYBPC3 | c.2497G>A          | p.Ala833Thr   | Missense   | 1  | VUS**                               | Pathogenic (5), uncertain (2), Benign (2) | 23, 29 | 0.16825% (203/120654) | 1  | Benign     | Benign (58)      | Possibly damaging | Neutral     | Medium  | Damaging  |
| MYBPC3 | c.2556delC         | p.Ala851fs    | Frameshift | 1  | Probable deleterious mutation       | -                                         | 23     | -                     | -  | -          | -                | -                 | -           | -       | -         |
| MYBPC3 | c.2558delG         | p.Gly853fs    | Frameshift | 1  | Predicted deleterious mutation      | -                                         |        | 0.00085% (1/117708)   | -  | -          | -                | -                 | -           | -       | -         |
| MYBPC3 | c.2614G>A          | p.Glu872Lys   | Missense   | 1  | VUS**                               | Uncertain (2)                             |        | 0.05867% (38/64766)   | 0  | Pathogenic | Benign (57)      | Probably damaging | Neutral     | Medium  | Tolerated |
| MYBPC3 | c.2686G>A          | p.Val896Met   | Missense   | 1* | VUS**                               |                                           |        | 1.27512% (297/23292)  | 17 | Benign     | Benign (22)      | Benign            | Neutral     | Neutral | Damaging  |
| MYBPC3 | c.2728C>A          | p.Pro910Thr   | Missense   | 1  | VUS**                               | Uncertain (4)                             |        | 0.03906% (6/15362)    | 33 | Benign     | Benign (38)      | Benign            | Neutral     | Neutral | Tolerated |
| MYBPC3 | c.2864_2865 delCT  | p.Pro955fs    | Frameshift | 5  | Predicted deleterious mutation      | Pathogenic (2)                            | 23, 24 | -                     | -  | -          | -                | -                 | -           | -       | -         |
| MYBPC3 | c.2905C>T          | p.Gln969Ter   | Nonsense   | 1  | Predicted deleterious mutation      | Pathogenic (3)                            | 23, 30 | -                     | -  | -          | -                | -                 | -           | -       | -         |
| MYBPC3 | c.3083C>T          | p.Thr1028Ile  | Missense   | 2  | VUS                                 | Pathogenic (1), Uncertain (1)             |        | -                     | 2  | Benign     | Benign (89)      | Probably damaging | Deleterious | Medium  | Damaging  |
| MYBPC3 | c.3107G>A          | p.Arg1036His  | Missense   | 1  | VUS                                 | Uncertain (1)                             |        | 0.00581% (7/120414)   | 15 | Benign     | Benign (29)      | Benign            | Neutral     | Low     | Tolerated |
| MYBPC3 | c.3124_3125 insAA  | p.Thr1042fs   | Frameshift | 1  | Published, disease-causing mutation | -                                         | 23, 24 | -                     | -  | -          | -                | -                 | -           | -       | -         |
| MYBPC3 | c.3190+2T>G        | p.IVS29+2T>G  | Splicing   | 1* | Presumed pathogenic                 |                                           |        | 0.00169% (2/118438)   | -  | -          | -                | -                 | -           | -       | -         |
| MYBPC3 | c.3190+3delG       | p.IVS29+3delG | Splicing   | 1  | Disease-causing mutation            | -                                         |        | -                     | -  | -          | -                | -                 | -           | -       | -         |
| MYBPC3 | c.3258G>A          | p.Trp1086Ter  | Nonsense   | 1  | Predicted deleterious mutation      | -                                         |        | 0.00218% (1/45884)    | -  | -          | -                | -                 | -           | -       | -         |
| MYBPC3 | c.3330+2T>G        | p.IVS30+2T>G  | Splicing   | 5  | Published, disease-causing mutation | -                                         | 31, 32 | -                     | -  | -          | -                | -                 | -           | -       | -         |
| MYBPC3 | c.3407_3409 delACT | p.Tyr1136Del  | InDel      | 1  | VUS                                 | Uncertain (1)                             |        | -                     | -  | -          | -                | -                 | -           | -       | -         |
| MYBPC3 | c.3512delA         | p.Asn1171fs   | Frameshift | 1  | Dominant, probably associated       | -                                         |        | -                     | -  | -          | -                | -                 | -           | -       | -         |
| MYBPC3 | c.3535G>A          | p.Glu1179Lys  | Missense   | 1* | VUS**                               |                                           |        | 0.04592% (49/106716)  | 1  | Benign     | Benign (57)      | Possibly damaging | Deleterious | Medium  | Tolerated |
| MYBPC3 | c.3624delC         | p.Lys1209fs   | Frameshift | 1  | Probable deleterious mutation       | -                                         |        | -                     | -  | -          | -                | -                 | -           | -       | -         |
| MYH7   | c.427C>T           | p.Arg143Trp   | Missense   | 1  | Disease-causing mutation            | Pathogenic (3), Uncertain (1)             |        | 0.00494% (6/121402)   | 0  | Pathogenic | Pathogenic (101) | Probably damaging | Deleterious | Medium  | Damaging  |
| MYH7   | c.428G>A           | p.Arg143Gln   | Missense   | 1  | VUS                                 | -                                         | 44     | 0.00082%              | 0  | Pathogenic | Benign (43)      | Probably          | Deleterious | Low     | Damaging  |

|      |           |              |          |   |                                         |                                                 |        |                          |   |            |                     |                      |             |         |           |
|------|-----------|--------------|----------|---|-----------------------------------------|-------------------------------------------------|--------|--------------------------|---|------------|---------------------|----------------------|-------------|---------|-----------|
|      |           |              |          |   |                                         |                                                 |        | (1/121400)               |   |            |                     | damaging             |             |         |           |
| MYH7 | c.715G>A  | p.Asp239Asn  | Missense | 1 | VUS                                     | Pathogenic (2),<br>Uncertain (1)                | 25     | -                        | 0 | Pathogenic | Benign (23)         | Probably<br>damaging | Deleterious | Low     | Tolerated |
| MYH7 | c.746G>A  | p.Arg249Gln  | Missense | 1 | Deleterious mutation                    | Pathogenic (5)                                  | 45, 46 | -                        | 0 | Pathogenic | Benign (43)         | Probably<br>damaging | Deleterious | Medium  | Damaging  |
| MYH7 | c.1370T>C | p.Ile457Thr  | Missense | 1 | VUS                                     | Pathogenic (1),<br>Uncertain (1)                | 36     | 0.00082%<br>(1/121396)   | 0 | Pathogenic | Benign (89)         | Probably<br>damaging | Deleterious | High    | Damaging  |
| MYH7 | c.1588A>G | p.Ile530Val  | Missense | 1 | Dominant, possibly<br>associated        | -                                               |        | 0.00082%<br>(1/121380)   | 0 | Pathogenic | Benign (30)         | Benign               | Deleterious | Medium  | Damaging  |
| MYH7 | c.1750G>A | p.Gly584Ser  | Missense | 1 | VUS                                     | Pathogenic (2)                                  | 13     | -                        | 0 | Pathogenic | Benign (55)         | Benign               | Deleterious | High    | Damaging  |
| MYH7 | c.1988G>A | p.Arg663His  | Missense | 1 | Deleterious mutation                    | Pathogenic (8)                                  |        | 0.00165%<br>(2/121338)   | 2 | Benign     | Benign (29)         | Possibly<br>damaging | Deleterious | Low     | Tolerated |
| MYH7 | c.2206A>G | p.Ile736Val  | Missense | 1 | VUS                                     | Pathogenic (1),<br>Uncertain (2)                |        | 0.00082%<br>(1/121406)   | 1 | Benign     | Benign (30)         | Probably<br>damaging | Neutral     | Neutral | Tolerated |
| MYH7 | c.2221G>T | p.Gly741Trp  | Missense | 2 | VUS                                     | Pathogenic (4),<br>Uncertain (1)                | 37, 38 | -                        | 2 | Benign     | Pathogenic<br>(184) | Probably<br>damaging | Deleterious | Medium  | Damaging  |
| MYH7 | c.2346C>A | p.Ser782Arg  | Missense | 1 | Possible deleterious<br>mutation        | Pathogenic (1)                                  |        | -                        | 4 | Benign     | Pathogenic<br>(109) | Possibly<br>damaging | Deleterious | Medium  | Damaging  |
| MYH7 | c.2546T>C | p.Met849Thr  | Missense | 1 | Possible deleterious<br>mutation        | Pathogenic (2)                                  |        | -                        | 4 | Benign     | Benign (81)         | Probably<br>damaging | Deleterious | Medium  | Damaging  |
| MYH7 | c.2681A>G | p.Glu894Gly  | Missense | 1 | VUS                                     | Pathogenic (4),<br>Uncertain (1)                |        | -                        | 1 | Benign     | Benign (98)         | Probably<br>damaging | Deleterious | Medium  | Damaging  |
| MYH7 | c.2717A>G | p.Asp906Gly  | Missense | 1 | Pathogenic                              | Pathogenic (4)                                  | 39     | -                        | 6 | Benign     | Benign (94)         | Benign               | Deleterious | Medium  | Damaging  |
| MYH7 | c.2722C>G | p.Leu908Val  | Missense | 4 | Deleterious mutation                    | Pathogenic (5)                                  | 40, 41 | -                        | 0 | Pathogenic | Benign (32)         | Probably<br>damaging | Deleterious | High    | Damaging  |
| MYH7 | c.2846A>T | p.Glu949Val  | Missense | 1 | VUS                                     | Pathogenic (2)                                  |        | 0.00082%<br>(1/121412)   | 0 | Pathogenic | Pathogenic<br>(121) | Probably<br>damaging | Deleterious | Medium  | Damaging  |
| MYH7 | c.2945T>C | p.Met982Thr  | Missense | 1 | VUS**                                   | Pathogenic (1),<br>Uncertain (4),<br>Benign (1) | 10, 42 | 0.09060%<br>(110/121412) | 0 | Pathogenic | Benign (81)         | Probably<br>damaging | Deleterious | Medium  | Damaging  |
| MYH7 | c.3066G>T | p.Lys1022Asn | Missense | 1 | VUS                                     | -                                               |        | -                        | 0 | Pathogenic | Benign (94)         | Probably<br>damaging | Deleterious | High    | Damaging  |
| MYH7 | c.3134G>A | p.Arg1045His | Missense | 1 | VUS                                     | -                                               | 43     | 0.00330%<br>(1/121396)   | 0 | Pathogenic | Benign (29)         | Probably<br>damaging | Deleterious | High    | Damaging  |
| MYH7 | c.3492C>A | p.Asn1164Lys | Missense | 1 | VUS                                     |                                                 |        | -                        | 0 | Pathogenic | Benign (94)         | Probably<br>damaging | Deleterious | High    | Damaging  |
| MYH7 | c.3613G>A | p.Glu1205Lys | Missense | 1 | Published, disease-<br>causing mutation | Pathogenic (1),<br>Uncertain (1)                |        | -                        | 0 | Pathogenic | Benign (57)         | Probably<br>damaging | Deleterious | High    | Damaging  |
| MYH7 | c.4259G>A | p.Arg1420Gln | Missense | 1 | Possible deleterious<br>mutation        | Pathogenic (2),<br>Uncertain (1)                |        | -                        | 0 | Pathogenic | Benign (43)         | Probably<br>damaging | Deleterious | High    | Damaging  |
| MYH7 | c.4283T>C | p.Leu1428Ser | Missense | 1 | Possible deleterious<br>mutation        | Pathogenic (1),<br>Uncertain (1)                |        | 0.00329%<br>(4/121404)   | 0 | Pathogenic | Pathogenic<br>(144) | Probably<br>damaging | Deleterious | Medium  | Damaging  |
| MYH7 | c.5302G>A | p.Glu1768Lys | Missense | 1 | VUS                                     | Pathogenic (1),<br>Uncertain (1)                |        | -                        | 0 | Pathogenic | Benign (57)         | Probably<br>damaging | Deleterious | High    | Damaging  |
| MYH7 | c.5344A>G | p.Met1782Val | Missense | 1 | Possible deleterious                    | Uncertain (2)                                   |        | -                        | 0 | Pathogenic | Benign (22)         | Probably             | Deleterious | Medium  | Tolerated |

|        |             |              |          |    | mutation                            |                               |        |                       |    |            |                  | damaging          |             |         |           |
|--------|-------------|--------------|----------|----|-------------------------------------|-------------------------------|--------|-----------------------|----|------------|------------------|-------------------|-------------|---------|-----------|
| MYL2   | c.103A>G    | p.Ile35Val   | Missense | 1  | Novel variant, likely mutation      | Pathogenic (1)                |        | -                     | 0  | Pathogenic | Benign (30)      | Possibly damaging | Neutral     | Neutral | Tolerated |
| MYL2   | c.173G>T    | p.Arg58Leu   | Missense | 1  | Likely disease-causing mutation     | -                             |        | -                     | 0  | Pathogenic | Pathogenic (102) | Probably damaging | Neutral     | Neutral | Damaging  |
| MYL3   | c.130-14G>T | p.IVS1-14G>T | Splicing | 1  | Unknown**                           | -                             |        | 0.15265% (184/120538) | -  | -          | -                | -                 | -           | -       | -         |
| PRKAG2 | c.247C>T    | p.Pro83Ser   | Missense | 1  | VUS                                 | Uncertain (1), Benign (1)     |        | -                     | 68 | Benign     | Benign (73)      | Benign            | Neutral     | Neutral | Tolerated |
| TNNI3  | c.497C>T    | p.Ser166Phe  | Missense | 1* | Deleterious mutation                | -                             |        | 0.00083% (1/119968)   | 7  | Benign     | Pathogenic (155) | Possibly damaging | Deleterious | Medium  | Damaging  |
| TNNI3  | c.586G>A    | p.Asp196Asn  | Missense | 1  | Published, disease-causing mutation | Pathogenic (3), Uncertain (1) | 24, 35 | 0.00083% (1/120728)   | 3  | Benign     | Benign (23)      | Probably damaging | Deleterious | Medium  | Damaging  |
| TNNT2  | c.257A>C    | p.Asp86Ala   | Missense | 1  | Possibly associated mutation        | Pathogenic (2)                |        | 0.00085% (1/117696)   | 1  | Benign     | Pathogenic (126) | Probably damaging | Deleterious | Low     | Damaging  |
| TNNT2  | c.236T>A    | p.Ile79Asn   | Missense | 1  | Deleterious mutation                | Pathogenic (6)                | 46, 47 | -                     | 25 | Benign     | Pathogenic (149) | Probably damaging | Deleterious | Low     | Damaging  |
| TNNT2  | c.388C>T    | p.Arg130Cys  | Missense | 1  | Probable deleterious mutation       | -                             | 48     | -                     | 0  | Pathogenic | Pathogenic (179) | Probably damaging | Deleterious | Medium  | Damaging  |
| TNNT2  | c.832C>T    | p.Arg278Cys  | Missense | 2  | Deleterious mutation**              | Pathogenic (3), Uncertain (4) | 49     | 0.04291% (40/93228)   | 9  | Benign     | Pathogenic (179) | Probably damaging | Deleterious | Low     | Damaging  |

\* Denotes a variant in a patient also hosting another variant

\*\* Denotes a variant that would be considered benign/VUS-likely benign based on high frequency of variant in ExAC exome data.
