# Supplementary material
Source: PubMed Central journal article supplement (PMC4907543)

Supplemental Figure 1

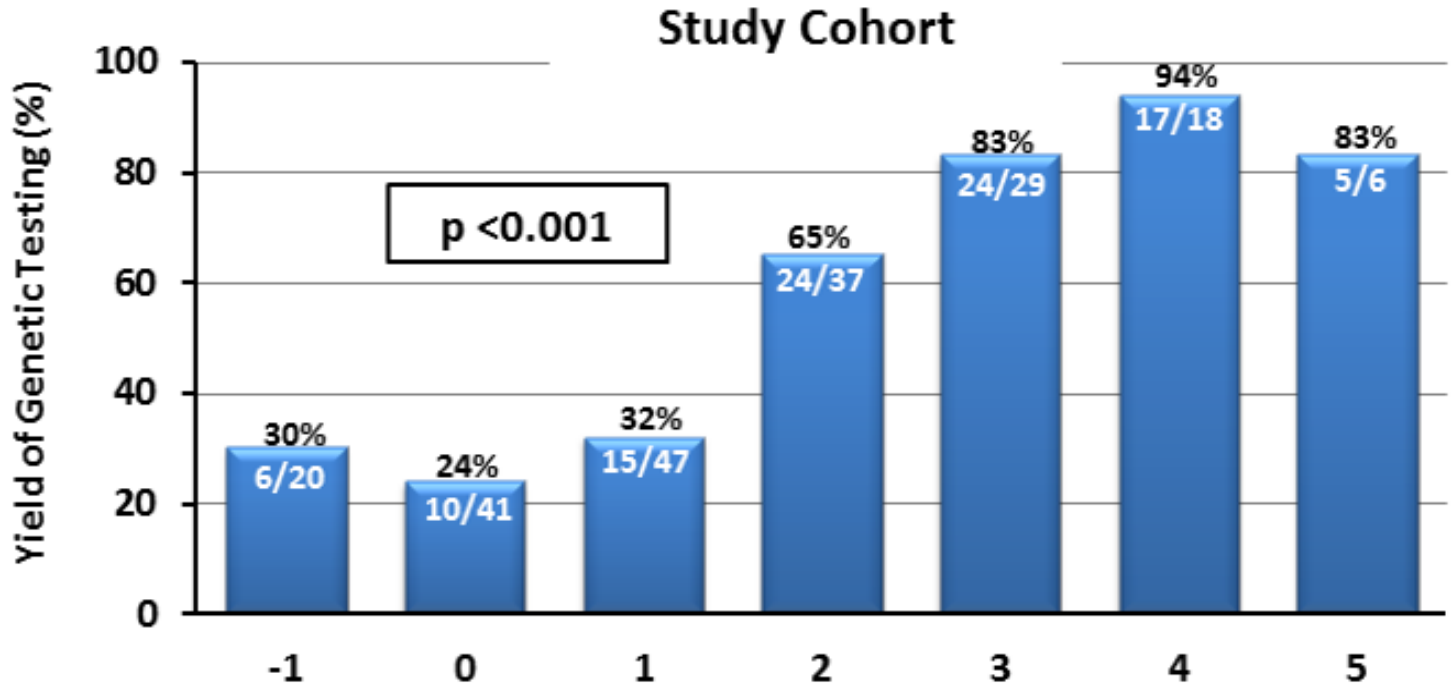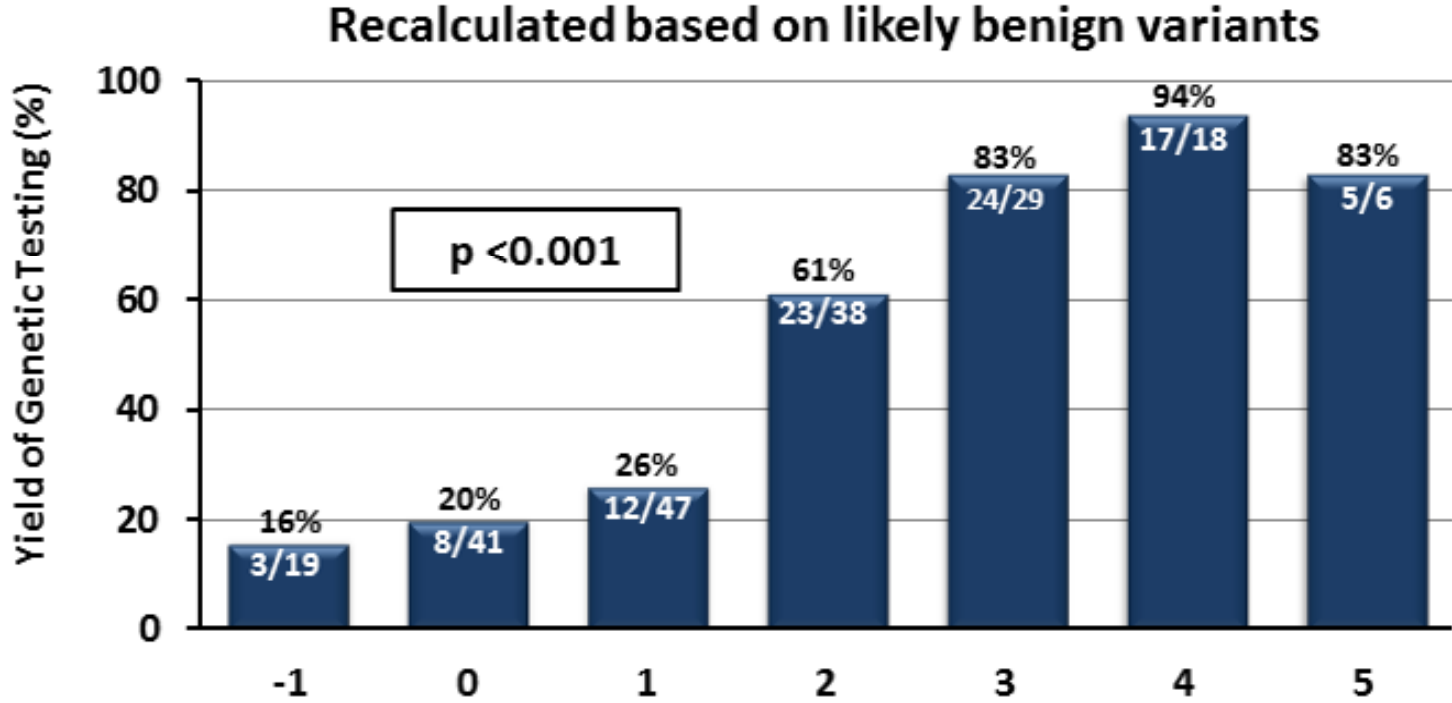

Supplement: NIHMS782597-supplement-Supplemental_Figure.pdf [file NIHMS782597-supplement-Supplemental_Figure.pdf]
